# Supplementary material
Source: Springer Nature journal article supplement (https://www.springermedizin.de/resource/supplementary/12943_2012_1113_MOESM3_ESM.pdf/9552486)

**A****CRIP1**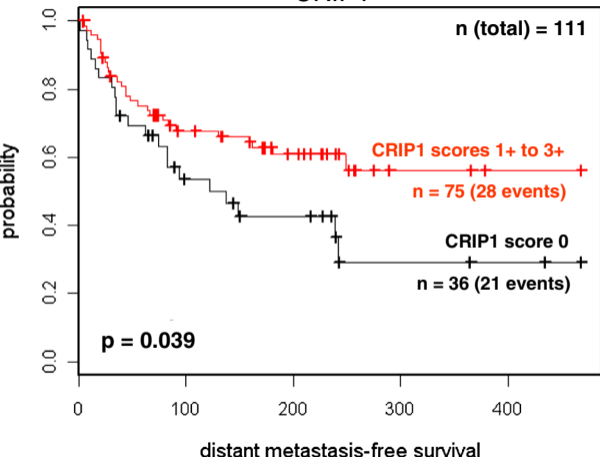**B****CRIP1 in HER2-positive tumors (1+ to 3+)**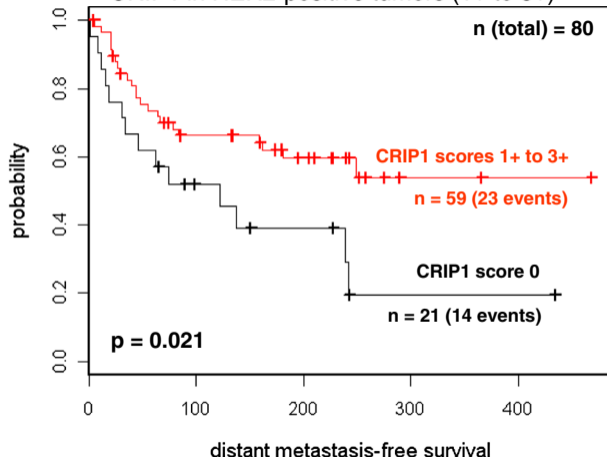

Supplement: MOESM3 [file 9552486]
